# Supplementary material for: The Impact of Different Animal-Derived Protein Sources on Adiposity and Glucose Homeostasis during Ad Libitum Feeding and Energy Restriction in Already Obese Mice
Source: MDPI journal article supplement (doi:10.3390/nu11051153), 2019-05-23
Supplement: s1 [file s1]

**(a) iWAT**

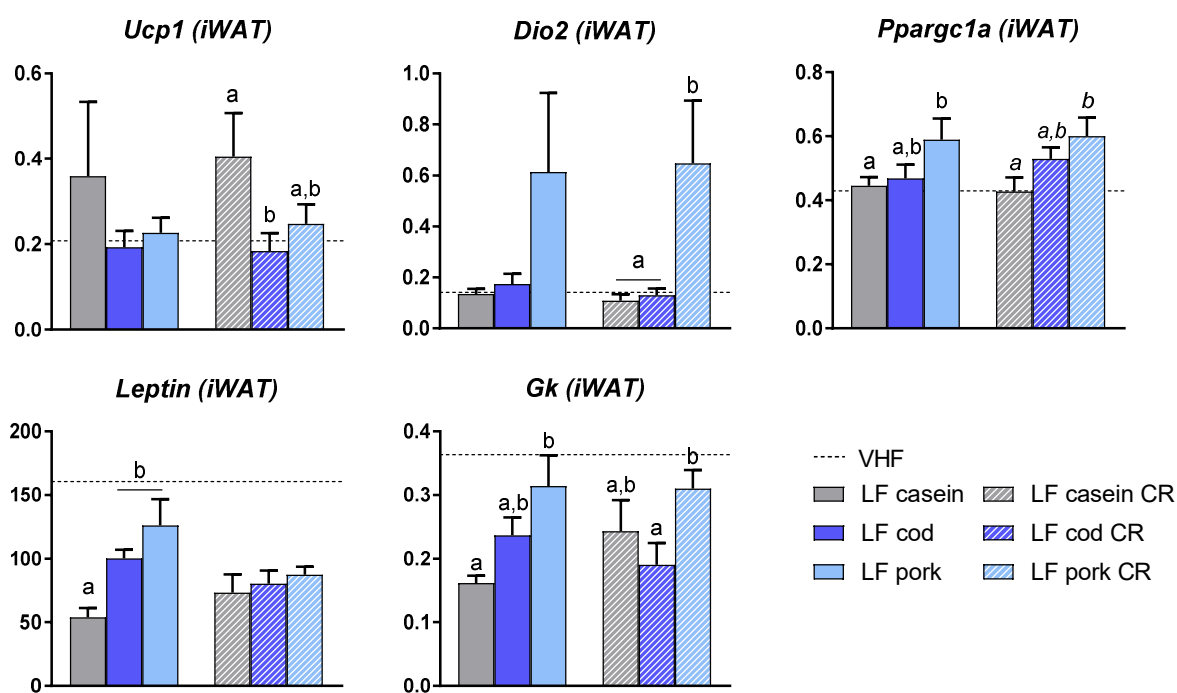

**(b) iBAT**

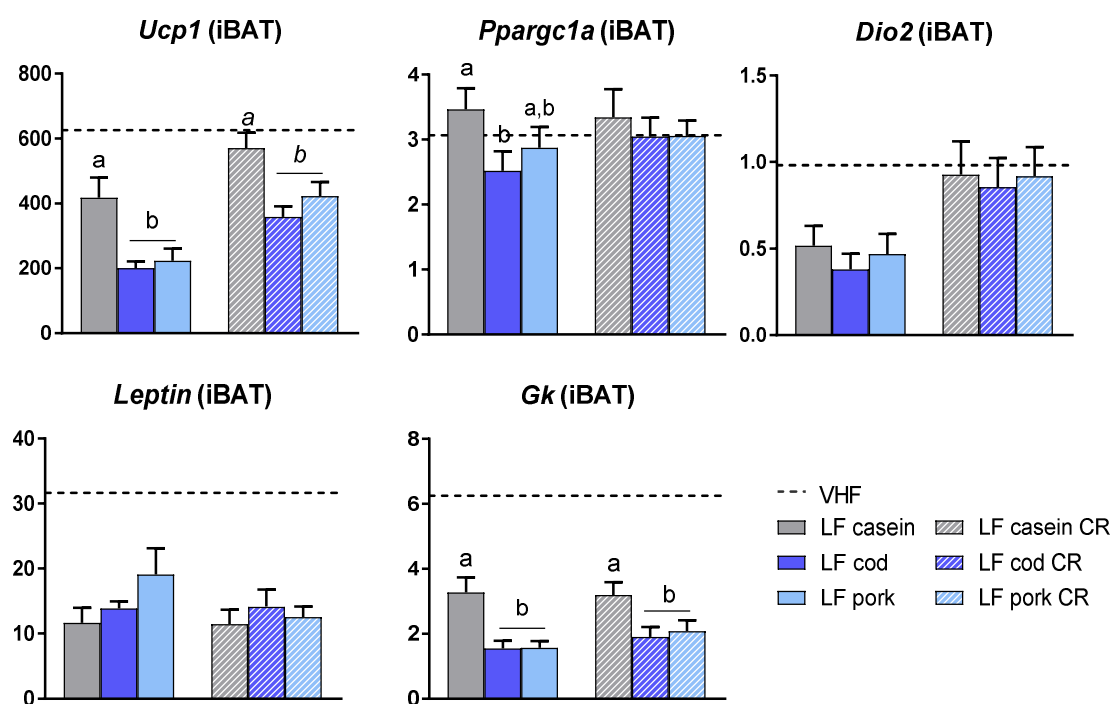

**Figure S6.** Expression levels of brown adipose tissue marker genes (uncoupling protein 1 (*Ucp1*), deiodinase iodothyronine type II (*Dio2*), peroxisome proliferator-activated receptor-g coactivator 1a (*Pparg1a*)), in addition to *Leptin* and Glycerol kinase (*Gk*) in **(a)** inguinal white adipose tissue (iWAT) and **(b)** interscapular brown adipose tissue (iBAT) after 6 weeks of feeding low-fat (LF) diets based on different protein sources *ad libitum* or with 30 per cent calorie restriction (CR) to already obese mice, in addition to one group fed the obesogenic very high-fat (VHF) diet *ad libitum* (n=8-10). Expression levels are normalized to gene expression of TATA-box binding protein (*TBP*).
