# Supplementary material for: The Impact of Different Animal-Derived Protein Sources on Adiposity and Glucose Homeostasis during Ad Libitum Feeding and Energy Restriction in Already Obese Mice
Source: MDPI journal article supplement (doi:10.3390/nu11051153), 2019-05-23
Supplement: s1 [file s1]

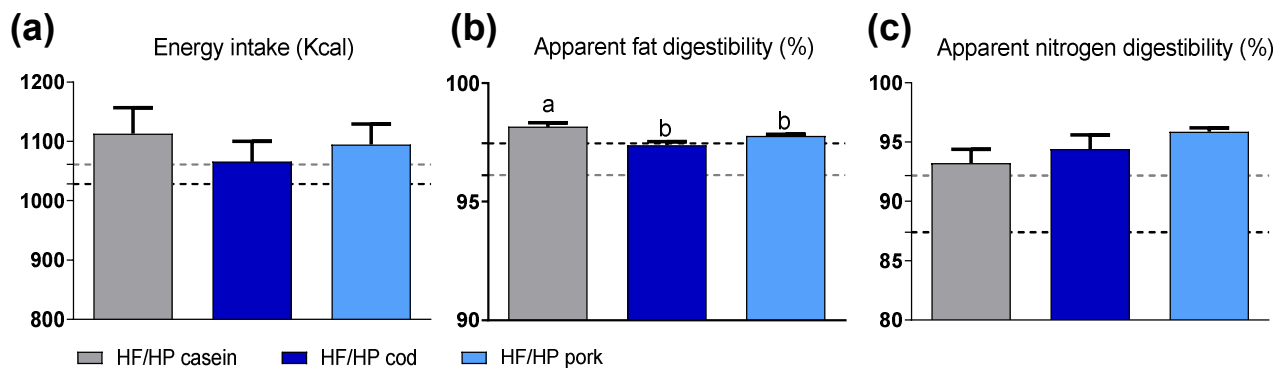

**Figure S2.** (a) Total energy intake (kcal) after 12 weeks, (b) apparent fat digestibility (%) and (c) apparent nitrogen digestibility (%) after 6 weeks of feeding *ad libitum* high-fat/high-protein (HF/HP) diets based on different protein sources to lean mice. Data are presented as mean  $\pm$  SEM (n=8-9) and different letters denote significant differences ( $P < 0.05$ ) by one-way ANOVA using uncorrected Fisher's LSD multiple comparison.
