# Supplementary material for: The Impact of Different Animal-Derived Protein Sources on Adiposity and Glucose Homeostasis during Ad Libitum Feeding and Energy Restriction in Already Obese Mice
Source: MDPI journal article supplement (doi:10.3390/nu11051153), 2019-05-23
Supplement: s1 [file s1]

## (a) iBAT

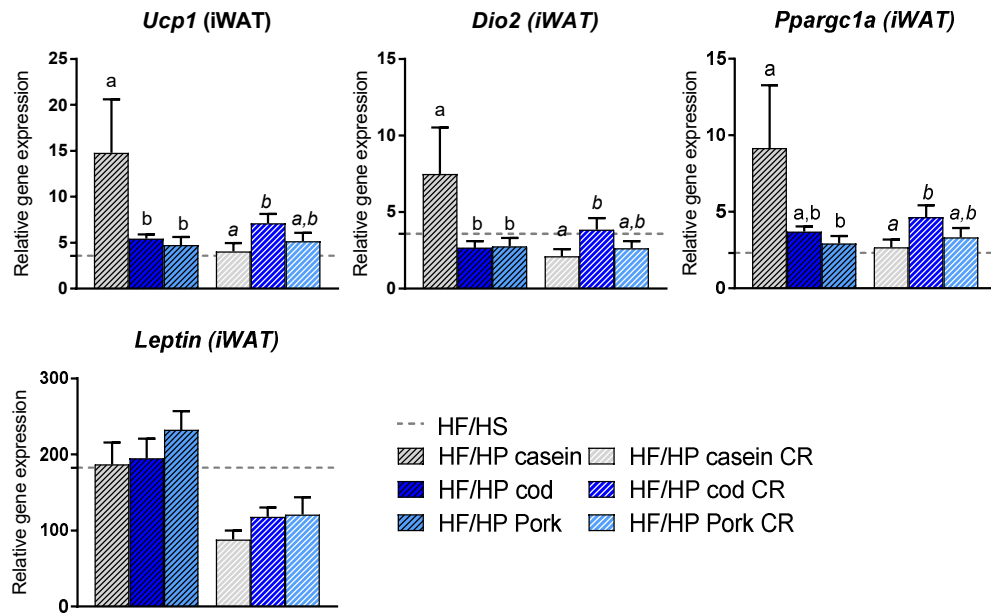

## (b) iWAT

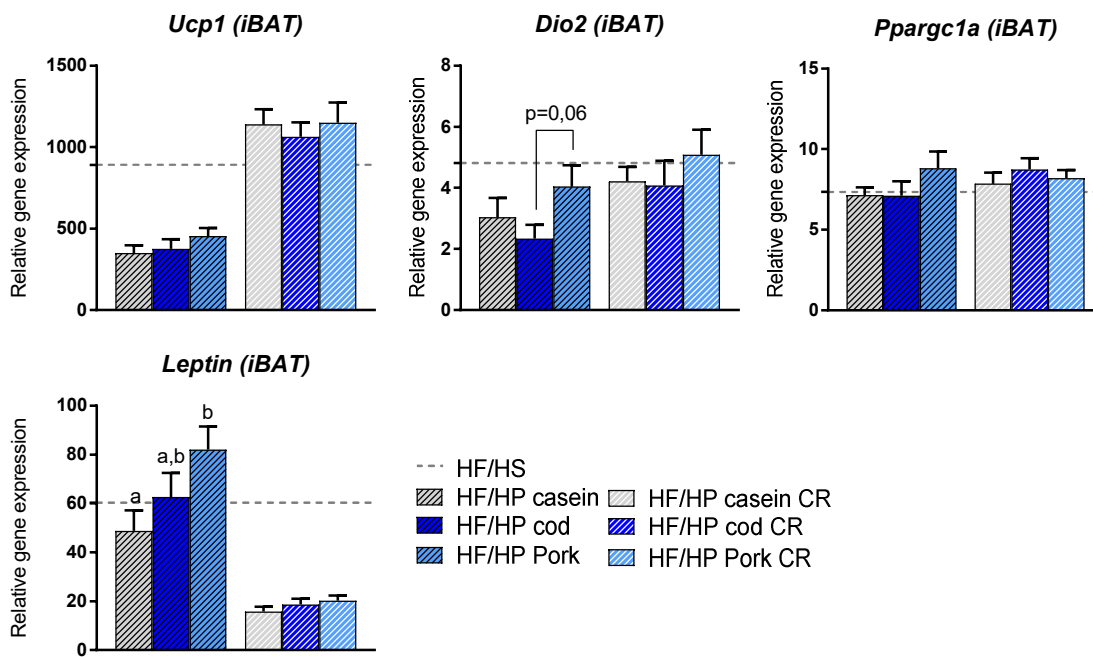

**Figure S4.** Expression levels of brown adipose tissue marker genes (Uncoupling protein 1 (*Ucp1*), Deiodinase iodothyronine type II (*Dio2*), Peroxisome proliferator-activated receptor-g coactivator 1a (*Pparg1a*)) and *Leptin* in **(a)** interscapular brown adipose tissue (iBAT) and **(b)** inguinal white adipose tissue (iWAT) after 6 weeks of feeding high-fat/high-protein (HF/HP) diets based on different protein sources *ad libitum* or with 30 per cent calorie restriction (CR) to already obese mice, in addition to one group fed the obesogenic high-fat/high-sucrose (HF/HS) diet (n=7-13). Expression levels are normalized to gene expression of TATA-box binding protein (*TBP*).
