# Supplementary material for: The Impact of Different Animal-Derived Protein Sources on Adiposity and Glucose Homeostasis during Ad Libitum Feeding and Energy Restriction in Already Obese Mice
Source: MDPI journal article supplement (doi:10.3390/nu11051153), 2019-05-23
Supplement: s1 [file s1]

Table S1. Primer sequences used for quantitative reverse transcriptase PCR.

| Gene name ( <i>abbreviation</i> )                                               | Accession number | Forward primer sequence | Reverse primer sequence |
|---------------------------------------------------------------------------------|------------------|-------------------------|-------------------------|
| Uncoupling protein 1 ( <i>Ucp1</i> )                                            | NM_009463.3      | AGCCGGCTTAATGACTGGAG    | TCTGTAGGCTGCCCAATGAAC   |
| Deiodinase iodothyronine type II ( <i>Dio2</i> )                                | NM_010050.2      | GCCCAGCAAATGTAGAC       | TGGCAATAAGGAGCTAGAA     |
| Peroxisome proliferator-activated receptor-g coactivator 1a ( <i>Ppargc1a</i> ) | NM_008904.2      | CATTTGATGCACTGACAGATGGA | CCGTCAGGCATGGAGGAA      |
| <i>Leptin</i>                                                                   | NM_008493.3      | ATTTCACACACGCAGTCGGTAT  | AAGCCCAGGAATGAAGTCCA    |
| Glycerol kinase ( <i>Gk</i> )                                                   | NM_001294138.1   | CAAATGCAAGCAGGACGATG    | GGCCCCAGCTTTCATTAGG     |
| TATA-Box Binding Protein ( <i>TBP</i> )                                         | NM_013684.3      | ACCCTTCACCAATGACTCCTATG | ATGATGACTGCAGCAAATCGC   |
