# Supplementary material for: The Impact of Different Animal-Derived Protein Sources on Adiposity and Glucose Homeostasis during Ad Libitum Feeding and Energy Restriction in Already Obese Mice
Source: MDPI journal article supplement (doi:10.3390/nu11051153), 2019-05-23
Supplement: s1 [file s1]

## iBAT

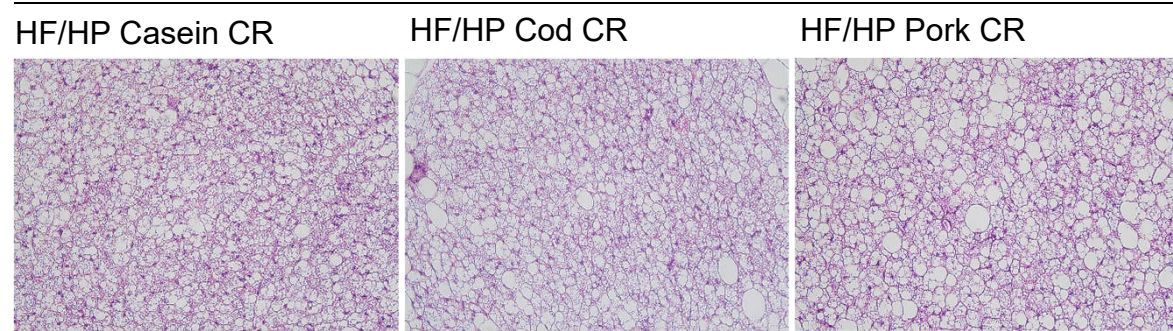

**Figure S5.** Hematoxylin and eosin (H&E) staining of interscapular brown adipose tissue (iBAT) after 6 weeks of feeding high-fat/high-protein (HF/HP) diets based on different protein sources with 30 per cent calorie restriction (CR) to already obese mice, in addition to one group fed the obesogenic high-fat/high-sucrose (HF/HS) diet (scalebar = 100 $\mu$ m).
